# Supplementary material for: Antimicrobial usage in broiler chicken production in the United States, 2013–2021
Source: Front Vet Sci. 2023 Apr 17;10:1139908. doi: 10.3389/fvets.2023.1139908 (PMC10150104; doi:10.3389/fvets.2023.1139908)
Supplement: Supplementary file 2 [file Data_Sheet_1.XLSX]

## Sheet: Hatchery
Year	Chicks_Placed		Gentamicin (g)	Penicillin (g)		Placements receiving Gentamicin	Placements receiving Penicillin	Placements receiving Nothing
2013	7099320561		874824	518000		6.08007e+09	323232135	6.9602e+08
2014	6989549333		774919	615297		5.34742e+09	369103071	1.27303e+09
2015	7652063534		496550	606994		3.39841e+09	369758701	3.88389e+09
2016	7799081679		420509	469827		2778124145	293171830	4727785704
2017	7980575828		282563	0		1654402567	0	6326173261
2018	7743582472		109448	0		689926344	0	7053656128
2019	7935362665		37755	0		232395274	0	7702967391
2020	8284444848		0	0		0	0	8284444848
2021	8245081339		0	0		0	0	8245081339

## Sheet: In-Feed
Year	Slaughtered (head)	Liveweight (lbs)		Lasalocid (g)	Monensin (g)	Narasin (g)	Salinomycin (g)		Lincomycin (g)	Ormetorprim-Sulfadimethoxine (g)	Chlortetracycline (g)	Oxytetracycline (g)	Tylosin (g)	Virginiamycin (g)		Avilamycin (g)	Bacitracin (g)	Bambermycins (g)
2013	6825820035	4.13305e+10		1.32706e+08	2.54867e+08	4.94225e+08	2.60763e+08		816800	126553	46233100	93150440	6.37873e+06	1.48266e+08		0	4.41211e+08	159944
2014	6688329433	4.14826e+10		1.63339e+08	2.87022e+08	3.33361e+08	3.697e+08		0	2181697	21752200	45130032	4.92371e+06	1.39756e+08		0	4.34205e+08	145807
2015	7294241950	4.60051e+10		1.15277e+08	2.32579e+08	4.23375e+08	3.30093e+08		0	467777	27346436	4182401	6.07558e+06	1.60977e+08		0	4.79788e+08	718671
2016	7454249403	4.77963e+10		1.04376e+08	3.68535e+08	3.75668e+08	3.11381e+08		0	502991	12038823	3230870	8.19067e+06	1.2567e+08		519789	3.96882e+08	1.78604e+06
2017	7609645310	4.90082e+10		9.02512e+07	2.79104e+08	3.11036e+08	2.12249e+08		0	60386.7	5341249	743390	0	70082042		1.33724e+07	4.51077e+08	1.60309e+06
2018	7364220275	4.68236e+10		5.58239e+07	1.52428e+08	3.10604e+08	1.96535e+08		39240	7718	2125000	0	0	53128821		3.98585e+06	3.50172e+08	1.25257e+06
2019	7532062726	4.83548e+10		4.84162e+07	1.22534e+08	2.67212e+08	1.18257e+08		0	12485	4000000	0	0	16726032		1.1775e+07	3.75605e+08	152300
2020	7909663865	5.08634e+10		4.53959e+07	5.13779e+07	2.80046e+08	1.3205e+08		0	17139	0	0	0	3556750		1.1467e+07	2.54851e+08	1.39637e+06
2021	7826121178	5.05508e+10		3.51271e+07	7.62349e+07	2.80244e+08	1.15347e+08		0	29510	0	0	0	4904380		1.68648e+07	197796458	2531683

## Sheet: Water-Soluble
Year	Slaughtered (head)	Liveweight (lbs)		Erythromycin (g)	Lincomycin (g)	Neomycin (g)	Penicillin (g)	Spectinomycin (g)	Sulfonamides (g)	Chlortetracycline (g)	Oxytetracycline (g)	Tylosin (g)		Bacitracin (g)
2013	6575274658	3.97996e+10		6936	2.76752e+06	725214	1.6791e+07	0	5.14195e+06	1.17965e+06	1.33029e+07	1.66947e+06		1.03552e+06
2014	6462650227	4.00523e+10		3468	4.29359e+06	1.7648e+06	2.5057e+07	0	4.73146e+06	2.40425e+06	9.73783e+06	2.55615e+06		2.34056e+06
2015	7294241950	4.60051e+10		5202	6.2263e+06	892350	2.99968e+07	40759.2	5.5981e+06	3.55163e+06	1.26049e+07	2.12412e+06		1.37656e+06
2016	7454249403	4.77963e+10		0	4.36014e+06	406390	2.74852e+07	13586.4	1.60109e+06	1.93029e+06	1.65152e+07	2.39992e+06		1.26941e+06
2017	7609645310	4.90082e+10		0	2.6098e+06	238011	1.78563e+07	0	1.90534e+06	1.61989e+06	9.39426e+06	891813		5.00352e+06
2018	7364220275	4.68236e+10		0	2.96417e+06	245770	1.39599e+07	0	538892	1.97915e+06	1.3832e+07	1.39308e+06		1.52809e+06
2019	7532062726	4.83548e+10		0	1.96014e+06	19966	7.42195e+06	0	358094	1.10737e+06	1.34019e+07	739038		1.24221e+06
2020	7909663865	5.08634e+10		0	1.18841e+06	231775	7.86859e+06	0	375735	172953	3.52254e+06	275708		1.48941e+06
2021	7826121178	5.05508e+10		0	1.20005e+06	639831	8.1978e+06	0	114262	50587.2	1.40006e+06	79009.4		1.45014e+06
