# Supplementary material for: Antimicrobial usage in broiler chicken production in the United States, 2013–2021
Source: Frontiers journal article supplement (doi:10.3389/fvets.2023.1139908), 2023-04-17
Supplement: Table_1.PDF [file Table_1.PDF]

Table S1. Antimicrobials that are Medically Important (MI) and that were used in broiler chicken production in the U.S. in 2021, categorized by route of administration. Antimicrobial drugs that were used within each class are shown as well as classification of importance per Appendix A of FDA's GFI #152 (U.S. Food and Drug Administration, 2003).

| Route of Administration | Drug Class          | Classification       | Active Ingredient                                                       |
|-------------------------|---------------------|----------------------|-------------------------------------------------------------------------|
| <b>Injectable</b>       |                     |                      |                                                                         |
|                         | Aminoglycosides     | Highly Important     | Gentamicin                                                              |
| <b>Feed</b>             |                     |                      |                                                                         |
|                         | Diaminopyrimidines  | Critically Important | Ormetoprim                                                              |
|                         | Streptogramins      | Highly Important     | Virginiamycin                                                           |
|                         | Sulfonamides        | Critically Important | Sulfadimethoxine                                                        |
|                         | Tetracyclines       | Highly Important     | Chlortetracycline<br>Oxytetracycline                                    |
| <b>Water</b>            |                     |                      |                                                                         |
|                         | Aminoglycosides     | Highly Important     | Neomycin<br>Spectinomycin                                               |
|                         | Lincosamides        | Highly Important     | Lincomycin                                                              |
|                         | Macrolides          | Critically Important | Tylosin                                                                 |
|                         | Natural penicillins | Highly Important     | Penicillin G                                                            |
|                         | Sulfonamides        | Critically Important | Sulfadimethoxine<br>Sulfamerazine<br>Sulfamethazine<br>Sulfaquinoxaline |
|                         | Tetracyclines       | Highly Important     | Chlortetracycline<br>Oxytetracycline<br>Tetracycline                    |

Table S2. Antimicrobials that are Not Medically Important (NMI) and that were used in broiler chicken production in the U.S. in 2021, categorized by route of administration. Antimicrobial drugs that were used within each class are shown.

| Route of Administration | Drug Class    | Active Ingredient |
|-------------------------|---------------|-------------------|
| Feed                    | Glycolipids   | Bambermycins      |
|                         | Ionophores    | Lasalocid         |
|                         |               | Monensin          |
|                         |               | Narasin           |
|                         |               | Salinomycin       |
|                         |               | Avilamycin        |
|                         | Orthosomycins | Bacitracin        |
|                         | Polypeptides  |                   |
|                         |               |                   |
| Water                   |               |                   |
|                         | Polypeptides  | Bacitracin        |

## REFERENCES

U.S. Food and Drug Administration (2013). *Guidance for Industry #213: New Animal Drugs and New Animal Drug Combination Products Administered in or on Medicated Feed or Drinking Water of Food-Producing Animals: Recommendations for Drug Sponsors for Voluntarily Aligning Product Use Conditions with GFI #209*. Retrieved from <https://www.fda.gov/regulatory-information/search-fda-guidance-documents/cvm-gfi-213-new-animal-drugs-and-new-animal-drug-combination-products-administered-or-medicated-feed>. Last accessed November 22, 2022.
